# Supplementary material for: Peptide–polyurea hybrids: a platform for tunable, thermally-stable, and injectable hydrogels
Source: Royal Society of Chemistry journal article supplement (doi:10.1039/d3sm00780d), 2023-01-01
Supplement: d3sm00780d1.pdf [file d3sm00780d1.pdf]

## Supporting Information

### Peptide-Polyurea Hybrids: A Platform for Tunable, Thermally-stable, and Injectable Hydrogels

Jessica Thomas<sup>1</sup>, Zachary R. Hinton<sup>1,2</sup>, LaShanda T.J. Korley<sup>1,2</sup>

<sup>1</sup>Materials Science and Engineering, University of Delaware, Newark, DE 19716

<sup>2</sup>Chemical and Biomolecular Engineering, University of Delaware, Newark, DE 19716

#### Table of Contents

|                                                                                                    |       |
|----------------------------------------------------------------------------------------------------|-------|
| 1. <sup>1</sup> H Nuclear magnetic resonance (NMR) Spectra .....                                   | 2-5   |
| 2. Vial inversion test of A5-10.....                                                               | 4     |
| 3. Calculation of peptide weight fractions .....                                                   | 6     |
| 4. Gel permeation chromatography (GPC) data .....                                                  | 6-7   |
| 5. Rheology of non-peptide control .....                                                           | 7     |
| 6. Frequency and amplitude sweeps for peptide-polyurea (PPU) hydrogels .....                       | 8     |
| 7. Injection simulation plots .....                                                                | 9-11  |
| 8. Recovery times for PPU hydrogels post injection simulation .....                                | 11    |
| 9. Temperature sweeps of PPU hydrogels at varying concentrations and measurement frequencies. .... | 12-14 |
| 10. Quasi gel-point curves of PPU hydrogels.....                                                   | 15    |
| 11. Circular Dichroism (CD) melting and cooling curves of $\alpha$ -helices .....                  | 15-16 |
| 12. Abbreviations.....                                                                             | 17    |

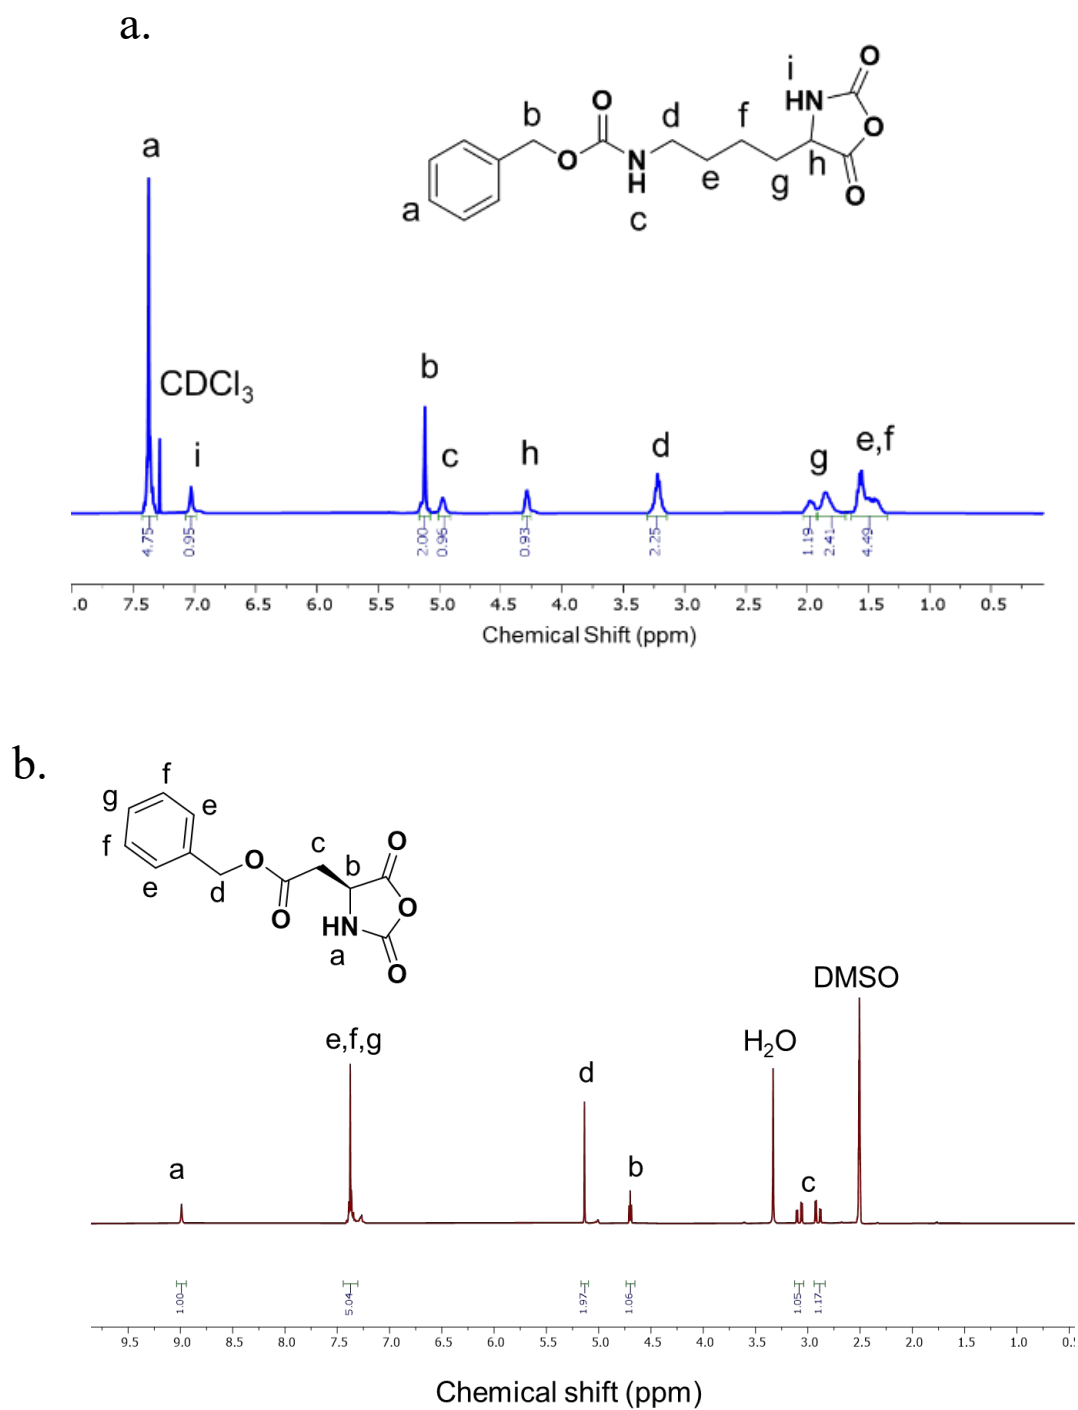

Figure S1: a.  $^1\text{H}$  NMR of ZLY-NCA in  $\text{CDCl}_3$ :  $\delta = 7.26$  ppm (s,  $\text{CDCl}_3$ ),  $\delta = 7.48$  ppm (m, 5H, Ph),  $\delta = 7.02$  ppm (NH)  $\delta = 5.12$  ppm (s, 2H,  $\text{PhCH}_2\text{O}$ ),  $\delta = 4.92$  ppm (NH),  $\delta = 4.28$  ppm (t, 1H, CH),  $\delta = 3.22$  ppm (q, 2H,  $\text{CH}_2\text{CH}_2\text{NH}$ ),  $\delta = 1.90$  ppm (m, 2H,  $\text{CH}_2\text{CH}_2\text{CH}$ ),  $\delta = 1.51$  ppm (m, 4H,  $\text{CH}_2\text{CH}_2\text{CH}_2$ ) b.  $^1\text{H}$  NMR of BLA-NCA in  $\text{D}_6\text{DMSO}$ :  $\delta = 9.0$  ppm (NH),  $\delta = 7.37$  ppm (m, 5H, Ph),  $\delta = 5.13$  ppm (s, 2H,  $\text{PhCH}_2\text{O}$ )  $\delta = 4.70$  ppm (t, 1H, CH),  $\delta = 3.08$ - $2.90$  ppm (m, 2H,  $\text{CH}_2$ ),  $\delta = 3.33$  ppm (s,  $\text{H}_2\text{O}$ ),  $\delta = 2.5$  ppm (s,  $\text{D}_6\text{DMSO}$ )

a.

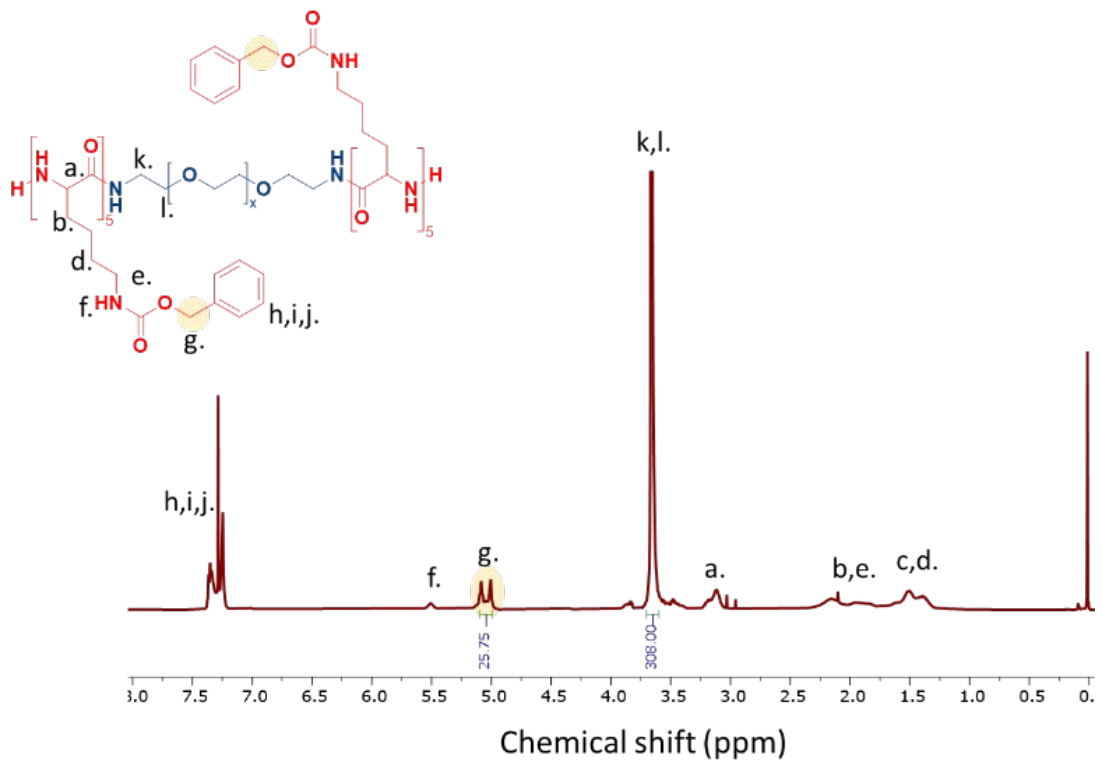

b.

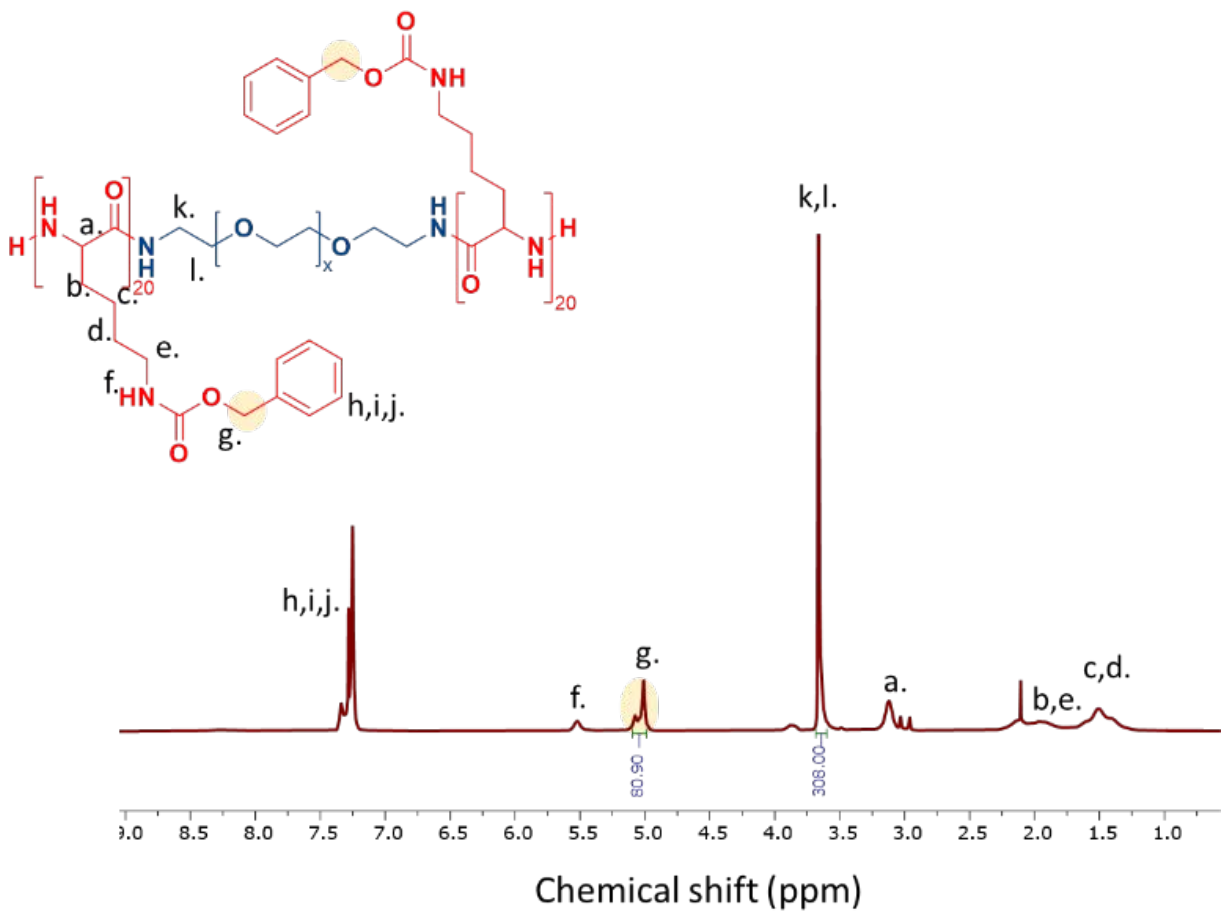

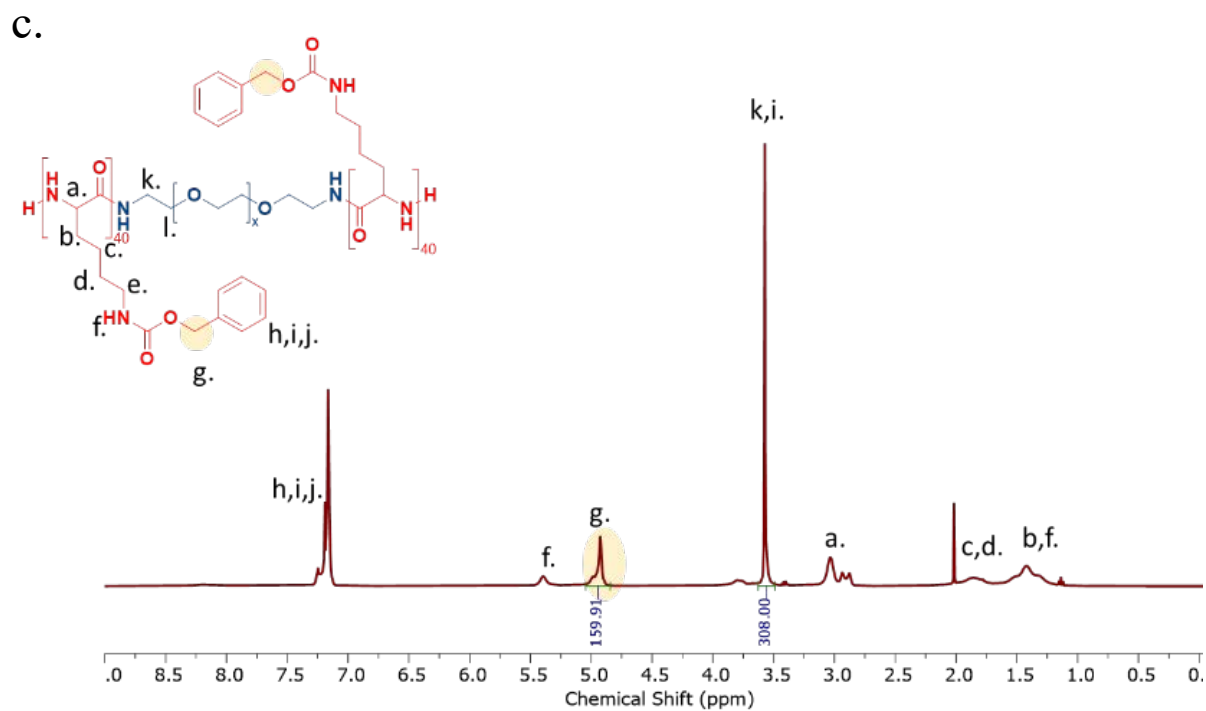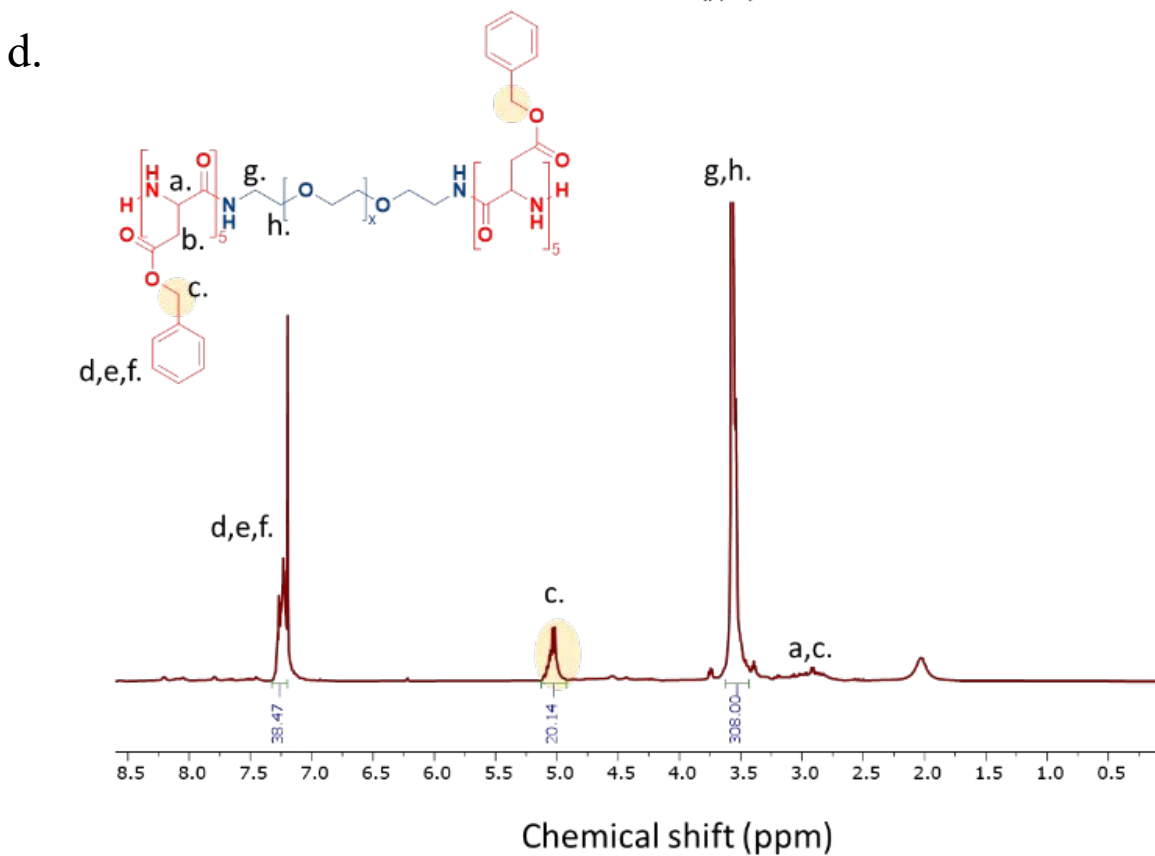

Figure S2:  $^1\text{H}$  NMR of triblock copolymers; a. Z5-10 b. Z20-10, c. Z40-10, and d. A5-10. Peptide repeat length was confirmed via end group analysis of the carbobenzyloxy group,

specifically the benzyl-adjacent protons (peak at ~5.0 ppm) compared to the PEG backbone signal (3.64 ppm).

a. Z5-10, b. Z20-10, and c. Z40-10:  $\delta = 7.26$  ppm ( $\text{CDCl}_3$ ),  $\delta = 7.34$  ppm (m, Ph),  $\delta = 5.5$  ppm (NH),  $\delta = 5.04$  ppm (broad s,  $\text{PhCH}_2\text{O}$ ),  $\delta = 3.64$  ppm ( $\text{CH}_2\text{CH}_2\text{O}$ ),  $\delta = 3.12$  ppm (m,  $\text{CH}_2\text{CH}_2\text{CH}$ ),  $\delta = 2.15$  ppm (m,  $\text{CH}_2\text{CH}_2\text{CH}$ ),  $\delta = 2.0$  (DMAc),  $\delta = 1.48$  ppm (m,  $\text{CH}_2\text{CH}_2\text{CH}$ )

d. A5-10  $\delta = 7.23$  ppm (m, Ph),  $\delta = 7.2$  ppm ( $\text{CDCl}_3$ ),  $\delta = 5.03$  ppm (broad s,  $\text{PhCH}_2\text{O}$ ),  $\delta = 2.9$  ppm (m, CH),  $\delta = 2.0$  (s, DMAc)

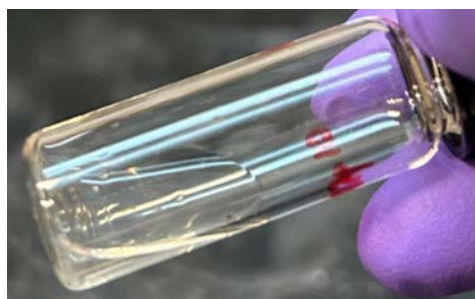

Figure S3: A5-10 10 wt% in PBS buffer. Solution fails the vial inversion test (*i.e.*, flows under gravity).

$$wt\%(peptide) = 100 \left( \frac{xM_{PZLY}}{xM_{PZLY} + yM_{PEG} + zM_{HDI}} \right)$$

Equation S1: calculated weight fraction of peptide in peptide polyurea hybrids (PPUs), where x, y and z are the molar quantities of the PZLY triblock, PEG and HDI, respectively, and  $M_{ZLY}$ ,  $M_{PEG}$  and  $M_{HDI}$  are the molecular weights of PZLY, PEG and HDI, respectively.

Table S1: Weight average molecular weight, number average molecular weight, and dispersity of PPU hybrids and non-peptidic control calculated from gel permeation chromatography (GPC) using 0.5 wt% LiBr in N,N-dimethyl acetamide (DMAc) used at the mobile phase. Distributions were generated using the calibration curve constructed for six poly(methyl methacrylate) standards (Agilent) in the range of 4.76 to 675.5 kg/mol.

| Polymer | Weight-Average Molecular Weight, $M_w$ ( $\text{kg mol}^{-1}$ ) | Number-Average Molecular Weight, $M_n$ ( $\text{kg mol}^{-1}$ ) | Dispersity ( $M_w/M_n$ ) |
|---------|-----------------------------------------------------------------|-----------------------------------------------------------------|--------------------------|
| Z5-10   | 190                                                             | 81.5                                                            | 2.3                      |
| Z20-10  | 192                                                             | 73.9                                                            | 2.6                      |
| Z40-10  | 428                                                             | 105                                                             | 4.1                      |
| A5-10   | 88.4                                                            | 42.2                                                            | 2.0                      |

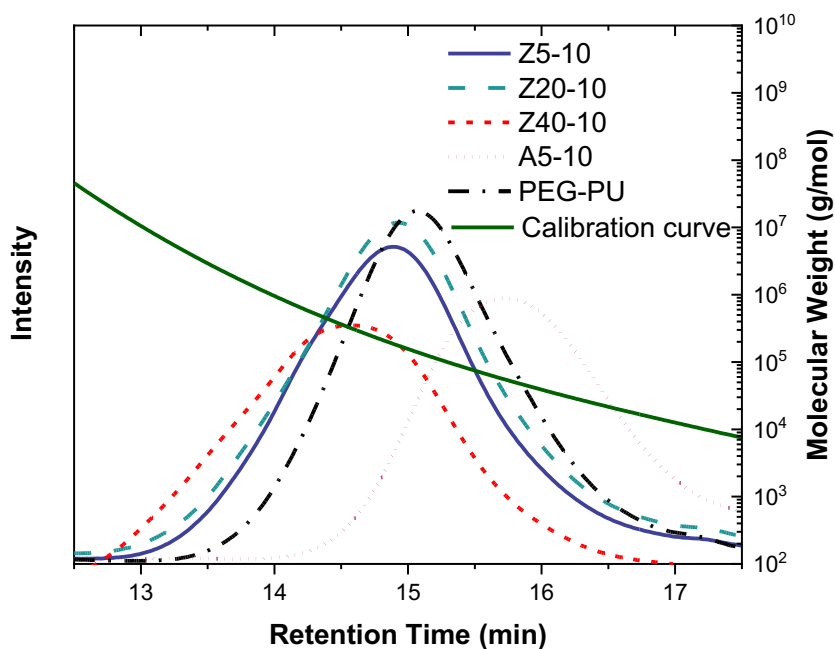

Figure S4: GPC traces of synthesized PPU and PEG-PU control.

## Rheological Characterization

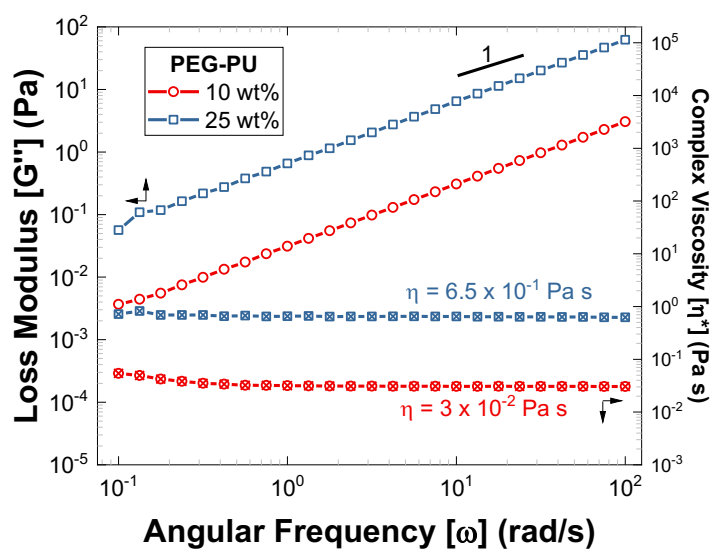

Figure S5: Frequency sweep of PEG-PU control sample at 10 and 25 wt% polymer in PBS buffer confirming liquid-like behavior. Storage moduli are omitted because of the measurements' low signal-to-noise ratio.

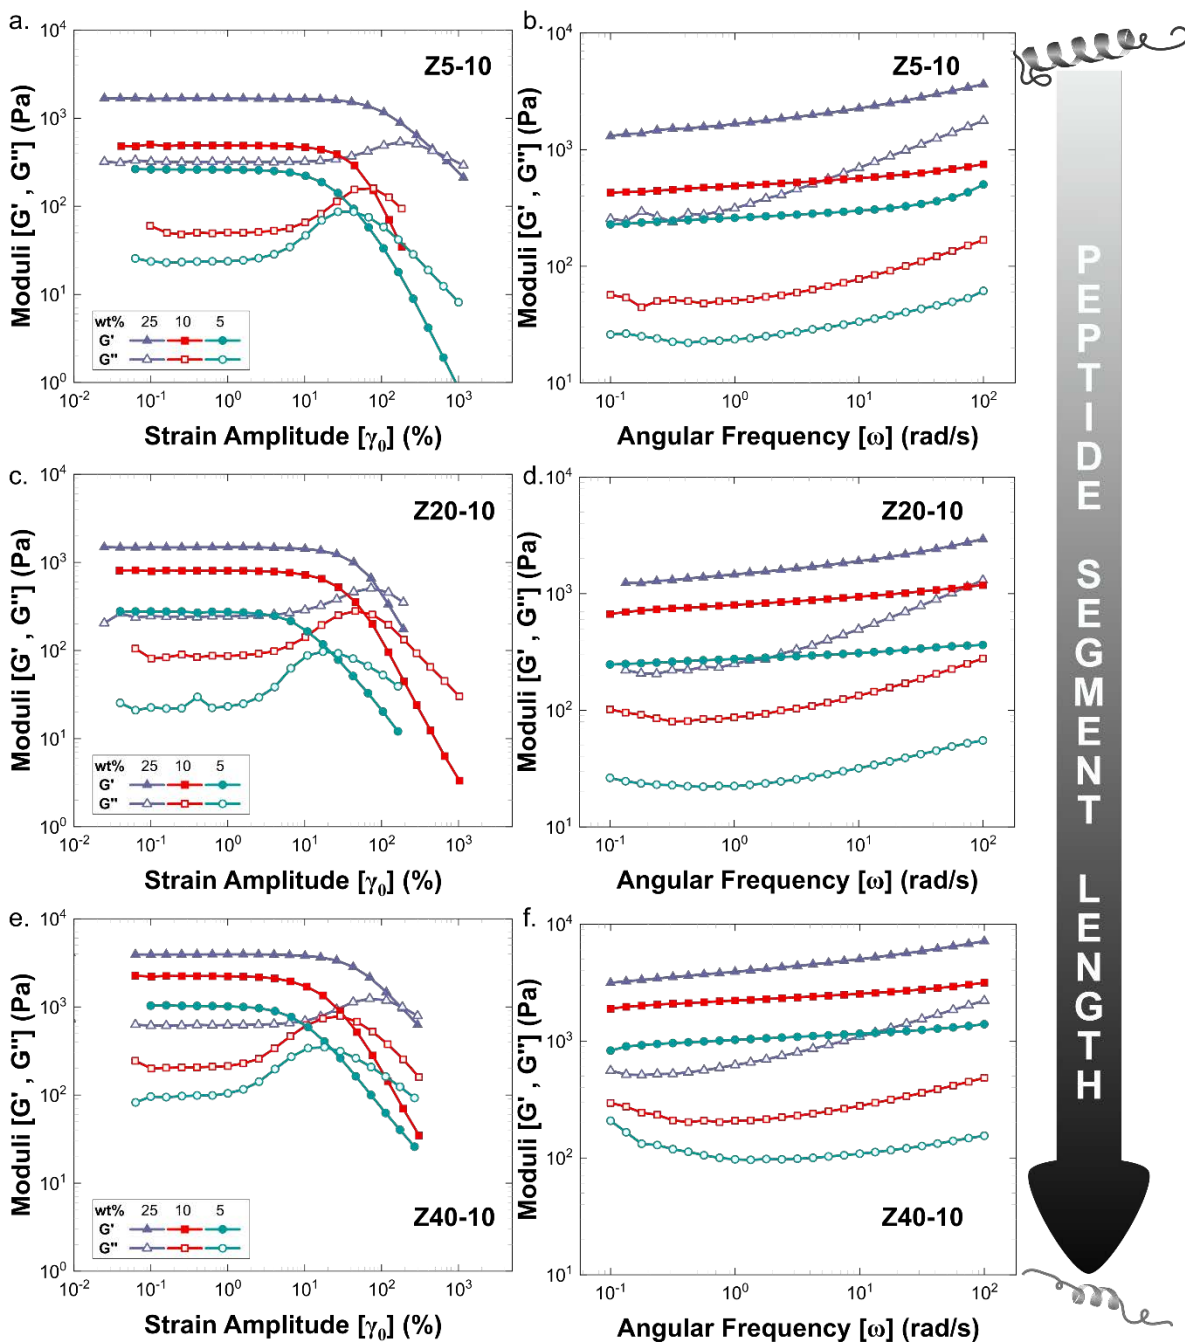



Figure S6. Frequency and amplitude sweeps for PPU hydrogels of varying peptide segment lengths and polymer concentration. Strain sweeps and frequency sweeps were performed at 1 rad/s and 0.5% strain, respectively. All measurements were made at 37 °C.

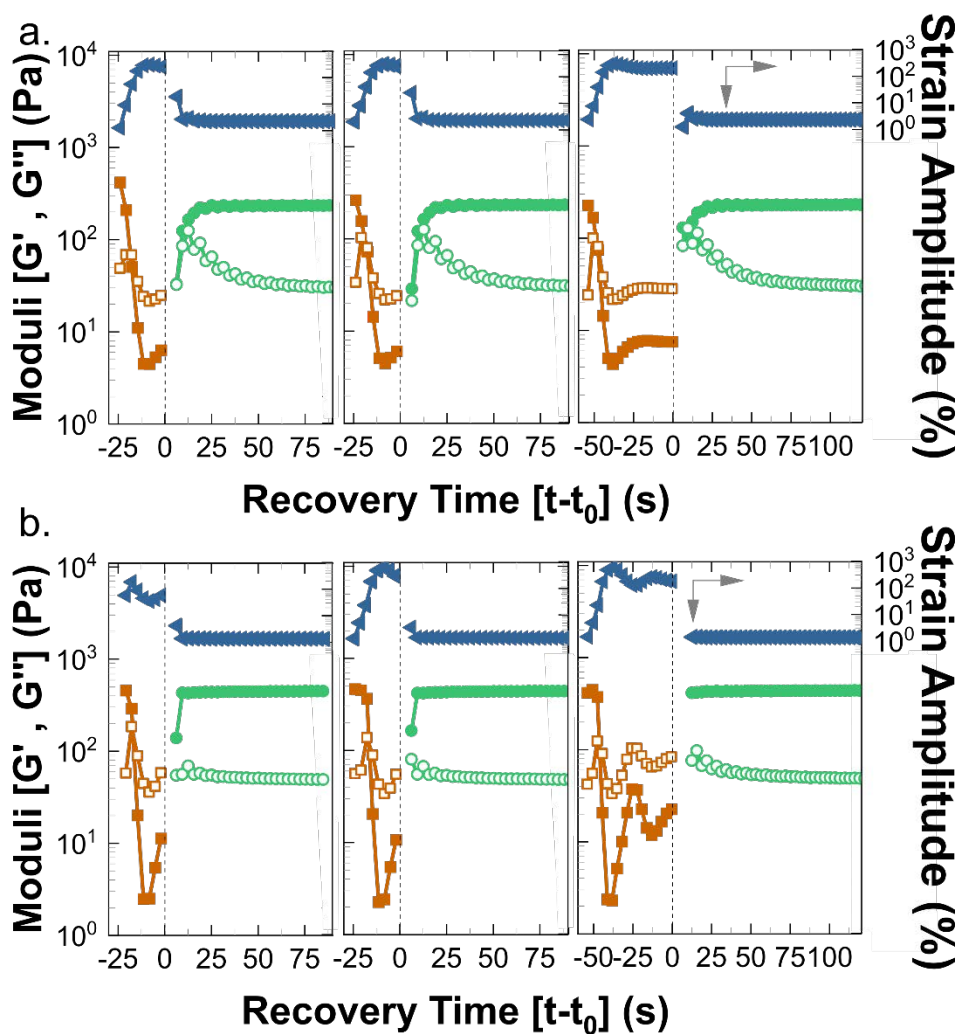

Figure S7. Simulated injection experiments on Z5-10 hydrogels at a. 5 wt% and b. 10 wt% in PBS. All experiments were performed at 37 °C. Filled and open symbols indicate storage ( $G'$ ) and loss ( $G''$ ) modulus, respectively.

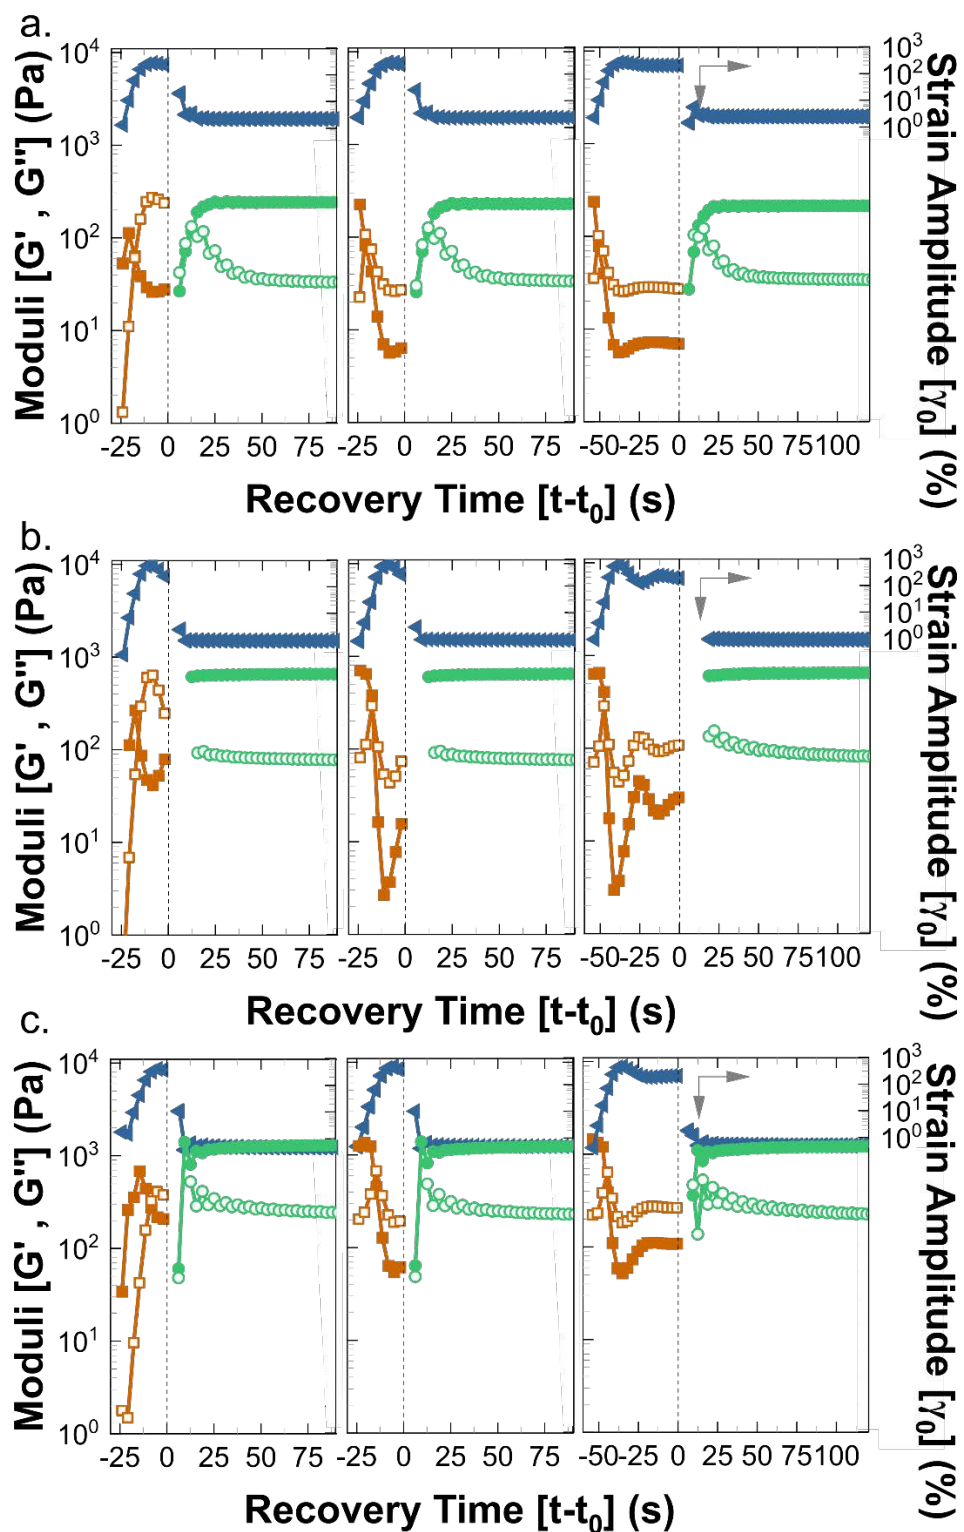

Figure S8. Simulated injection experiments on Z20-10 hydrogels at a. 5 wt%, b. 10 wt%, and c. 25 wt% in PBS. All experiments were performed at 37 °C. Filled and open symbols indicate  $G'$  and  $G''$ , respectively.

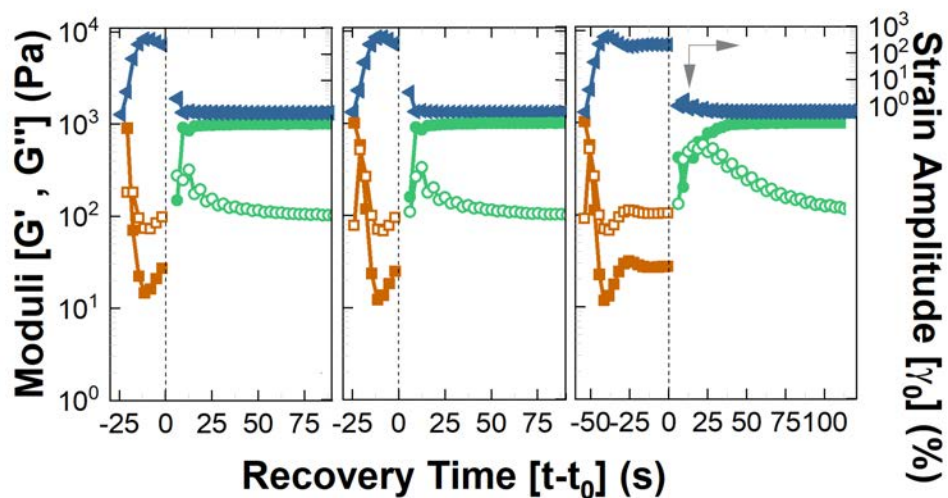

Figure S9. Simulated injection experiments on Z40-10 hydrogels at 5 wt% in PBS. The experiment was performed at 37 °C. Filled and open symbols indicate  $G'$  and  $G''$ , respectively.

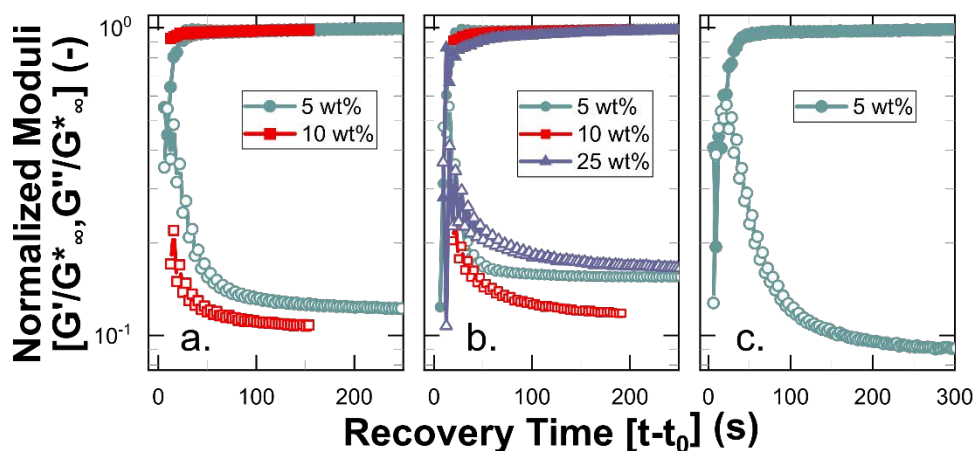

Figure S10. Recovery after simulated injection of a. Z5-10, b. Z20-10, and c. Z40-10 hydrogels at different concentrations in PBS. Experiment was performed at 37 °C. Moduli have been normalized by the value of the complex modulus at equilibrium ( $G^*_{\infty}$ ). Filled and open symbols indicate  $G'/G^*_{\infty}$  and  $G''/G^*_{\infty}$ , respectively.

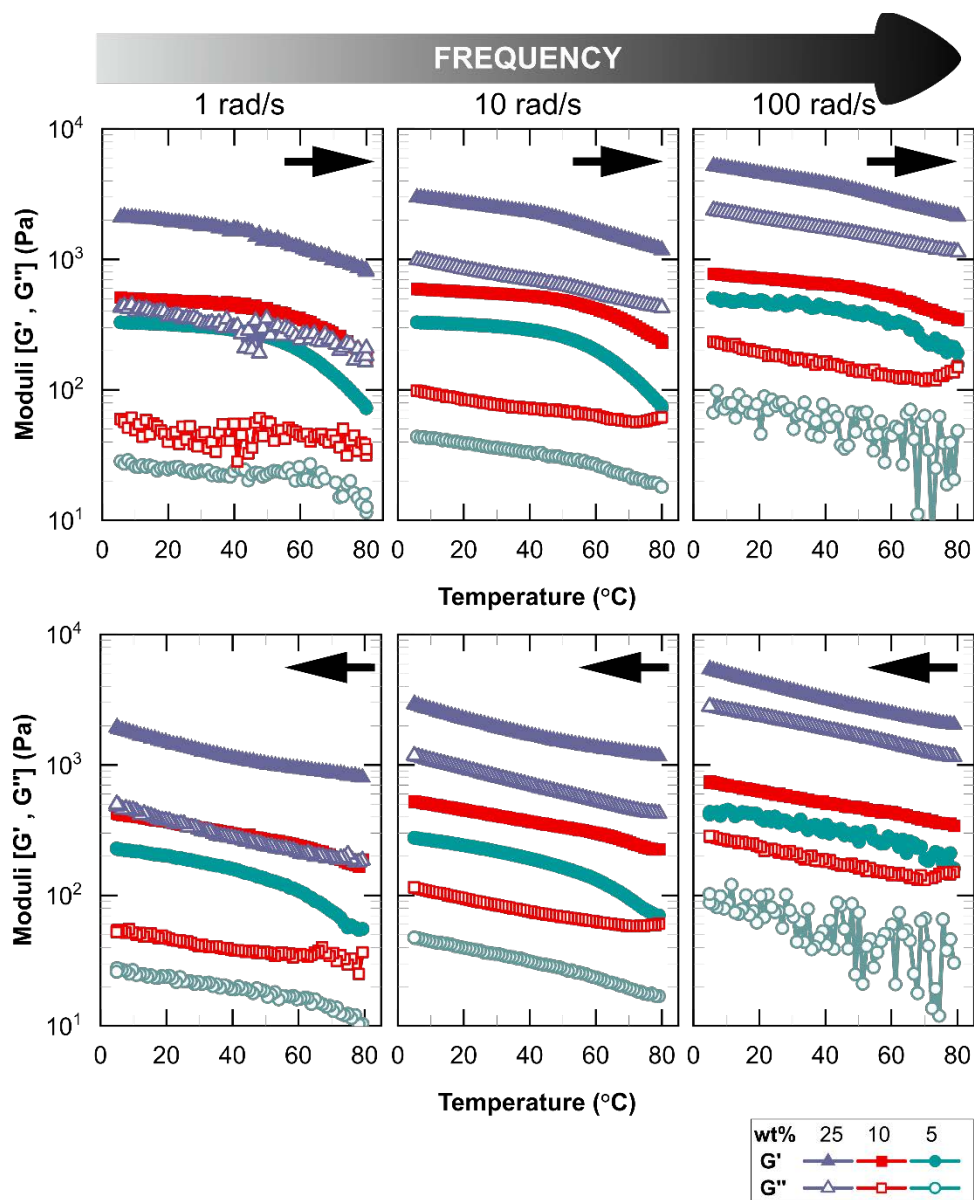

Figure S11. Temperature sweeps of Z5-10 PPU hydrogels of varying concentrations and measurement frequencies. Panels in the top and bottom rows are for heating and cooling cycles, respectively. Measurements were made at a fixed strain amplitude of 0.1%.

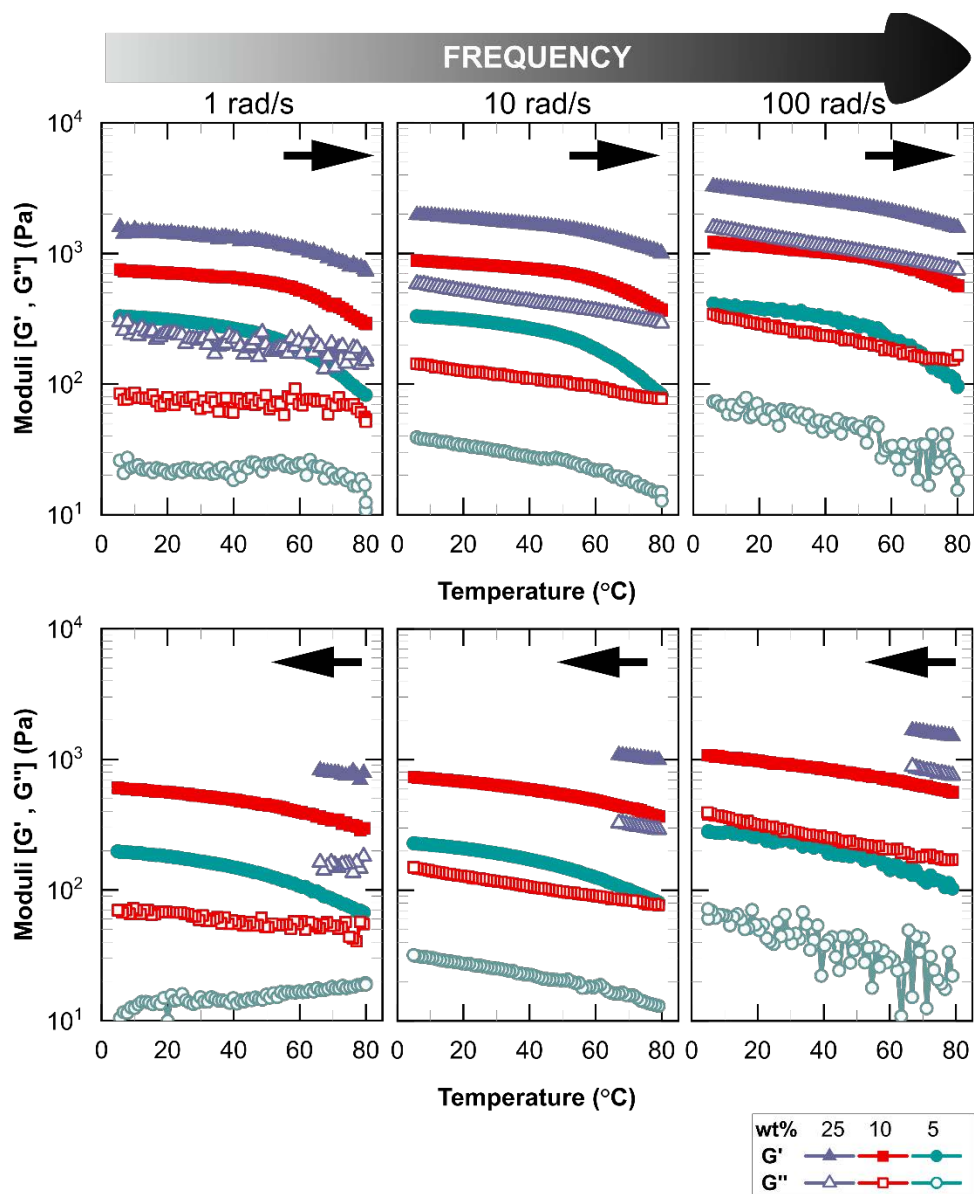

Figure S12. Temperature sweeps of Z20-10 hydrogels of varying concentrations and measurement frequencies. Panels in the top and bottom rows are for heating and cooling cycles, respectively. Measurements were made at a fixed strain amplitude of 0.1%. The cooling cycle for 25 wt% was stopped prematurely because of an experimental error.

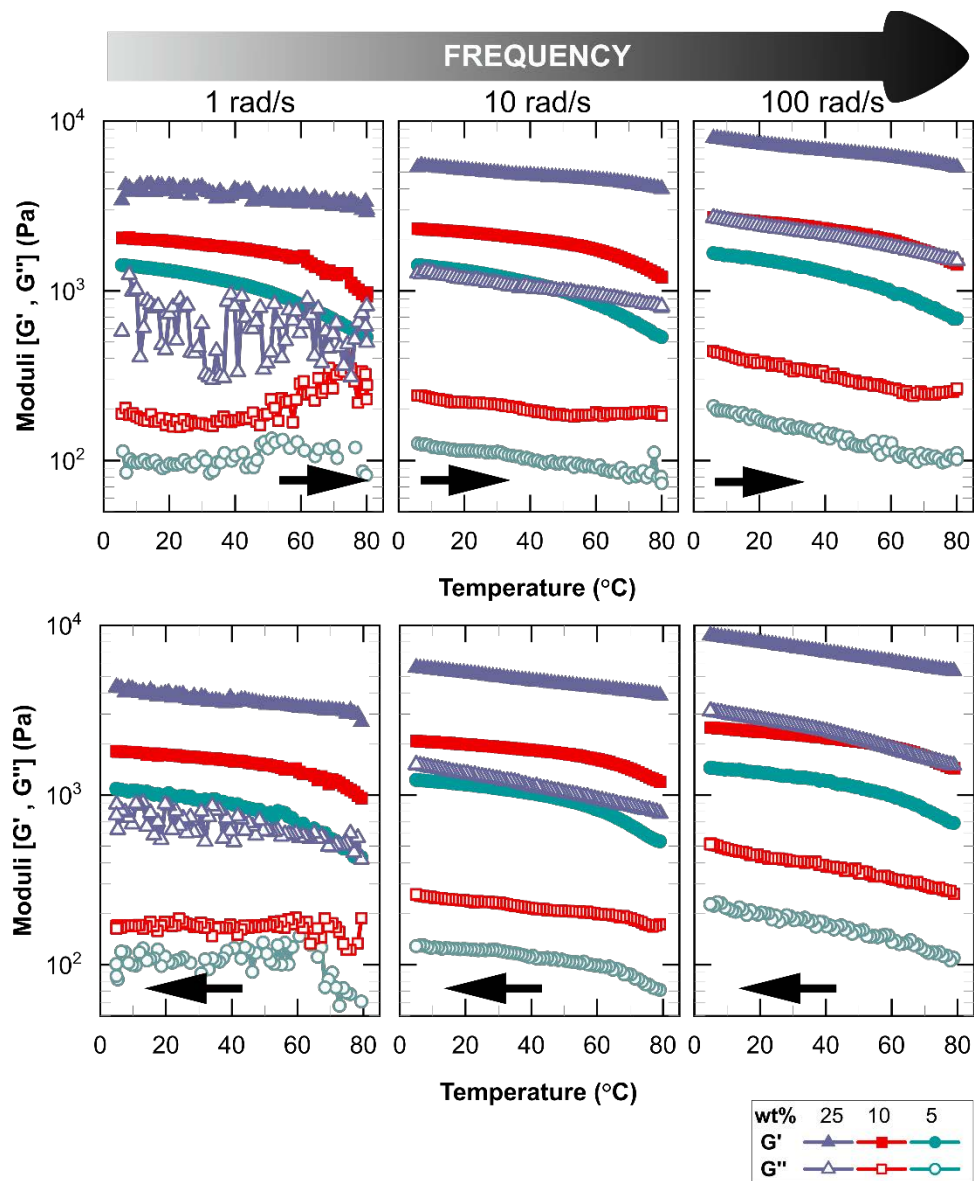

Figure S13. Temperature sweeps of Z40-10 hydrogels of varying concentrations and measurement frequencies. Panels in the top and bottom rows are for heating and cooling cycles, respectively. Measurements were made at a fixed strain amplitude of 0.1%.



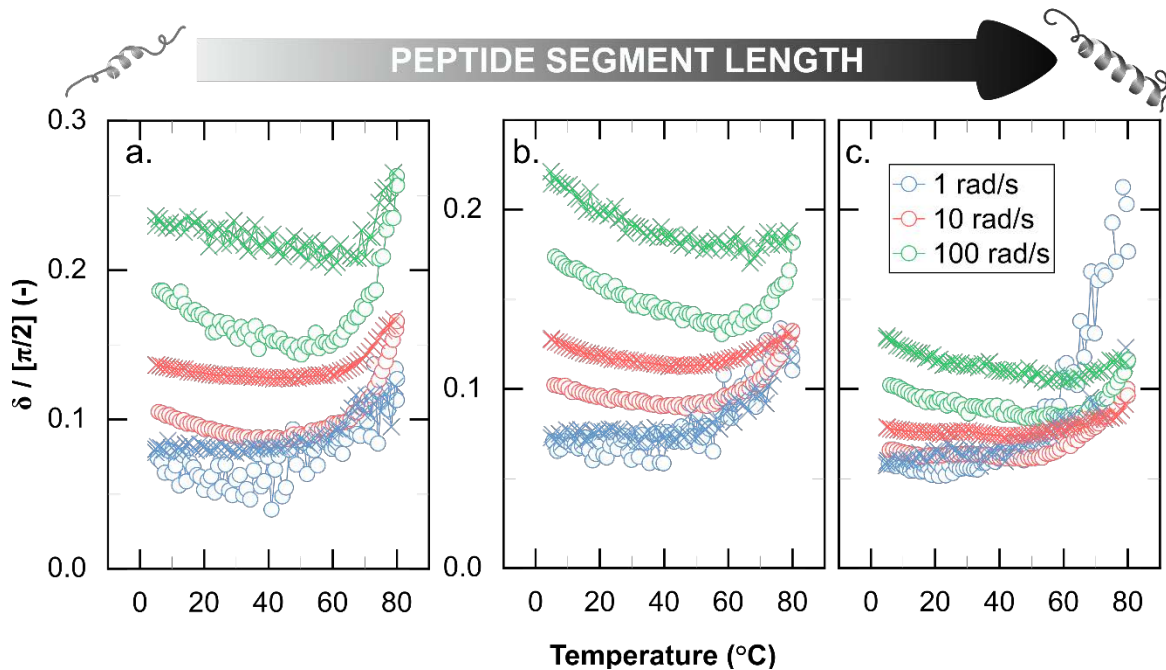

Figure S14. Quasi gel-point curves for 10 wt% a. Z5-10, b. Z20-10, and c. Z40-10 hydrogels undergoing heating (circles) and cooling (crosses) cycles of a temperature ramp depicting the phase angle ( $\delta$ ). Each curve was measured at a single frequency.

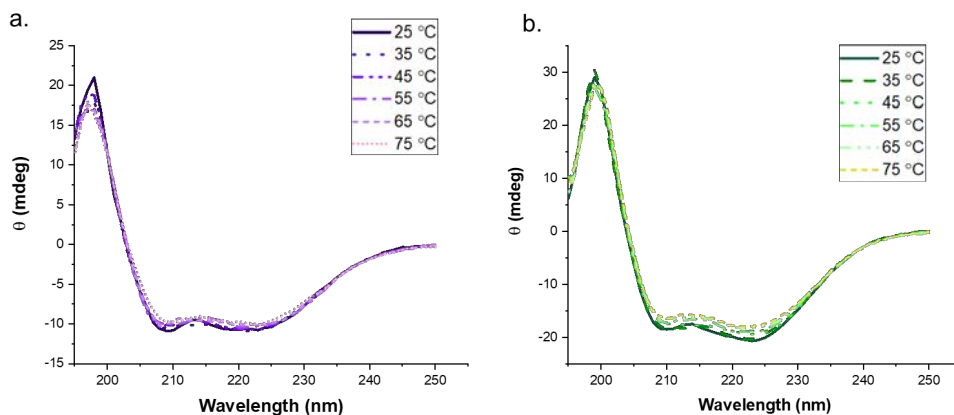

Figure S15: CD melting curves of a. Z5-10 and b. Z40-10 PPU hybrids. As in the Z20-10 sample shown in the main text, only slight melting of the secondary structures is observed, with the  $\alpha$ -helices remaining largely stable up to 80 °C.

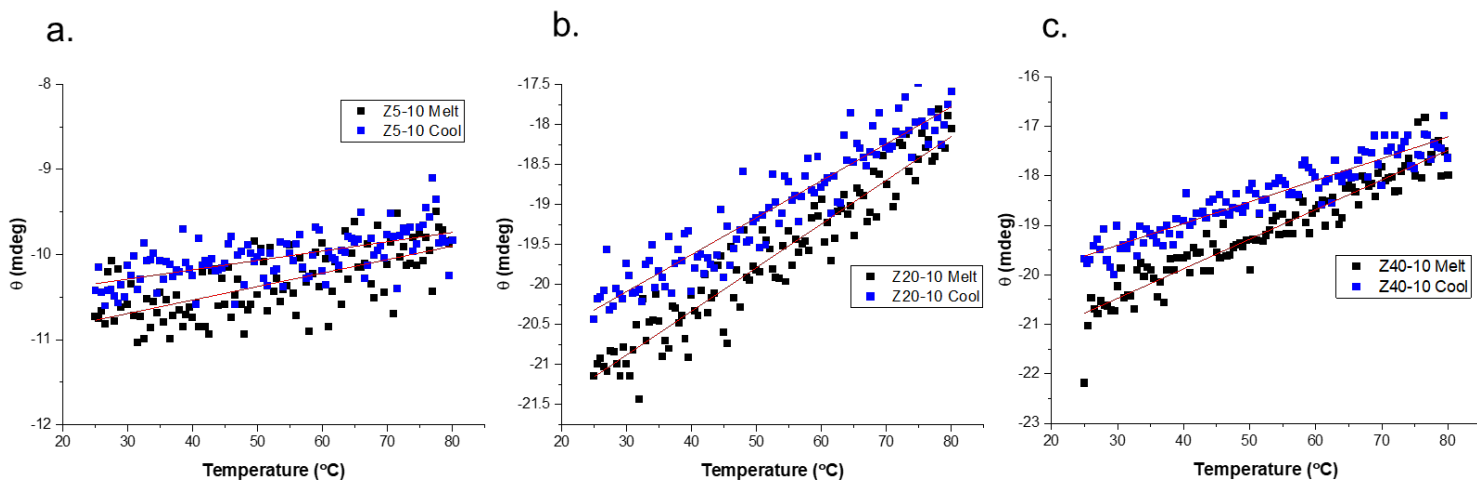

Figure S16: CD heating and cooling curves of PPUs monitored at 222 nm showing that slight melting of  $\alpha$ -helices in PPUs is reversible, with some hysteresis being present in the cooling cycle for all samples.



**Abbreviations:**

|                     |                                                |
|---------------------|------------------------------------------------|
| BLA-NCA             | $\beta$ -Benzyl-L-aspartate N-carboxyanhydride |
| CD                  | Circular dichroism                             |
| CDCl <sub>3</sub>   | Deuterated chloroform                          |
| D <sub>6</sub> DMSO | Deuterated dimethyl sulfoxide                  |
| GPC                 | Gel permeation chromatography                  |
| HDI                 | Hexamethylene diisocyanate                     |
| NMR                 | Nuclear magnetic resonance                     |
| PBLA                | Poly( $\beta$ -benzyl-L- aspartate)            |
| PEG                 | Poly(ethylene glycol)                          |
| PPU                 | Peptide-polyurea                               |
| PZLY                | Poly( $\epsilon$ -carbobenzyloxy-L-lysine)     |
| SEM                 | Scanning electron microscopy                   |
| Cryo-TEM            | Cryogenic-transmission electron microscopy     |
| ZLA-NCA             | Carbobenzyloxy-L-lysine N-carboxyanhydride     |

Final PPU samples are labeled with the nomenclature **ZN-X**, or **AN-X** where Z or A refer to PZLY or PBLA, respectively, N denotes the peptide repeat length, and X represents peptide weight percent in the polyurea.
